# Supplementary material for: A gadolinium(III) complex with 8-amidequinoline based ligand as copper(II) ion responsive contrast agent
Source: Royal Society of Chemistry journal article supplement (doi:10.1039/c0dt01141j), 2010-11-27
Supplement: c0dt01141j.pdf [file c0dt01141j.pdf]

# Electronic Supporting Information

## **A gadolinium(III) complex with 8-amidequinoline based ligand as copper(II) ion responsive contrast agent**

Wei-Sheng Li, Jian Luo, Zhong-Ning Chen\*

*State Key Laboratory of Structural Chemistry, Fujian Institute of Research on the Structure of Matter, Chinese Academy of Sciences, Fuzhou, Fujian 350002, China.*

E-mail: [czn@fjirsm.ac.cn](mailto:czn@fjirsm.ac.cn)

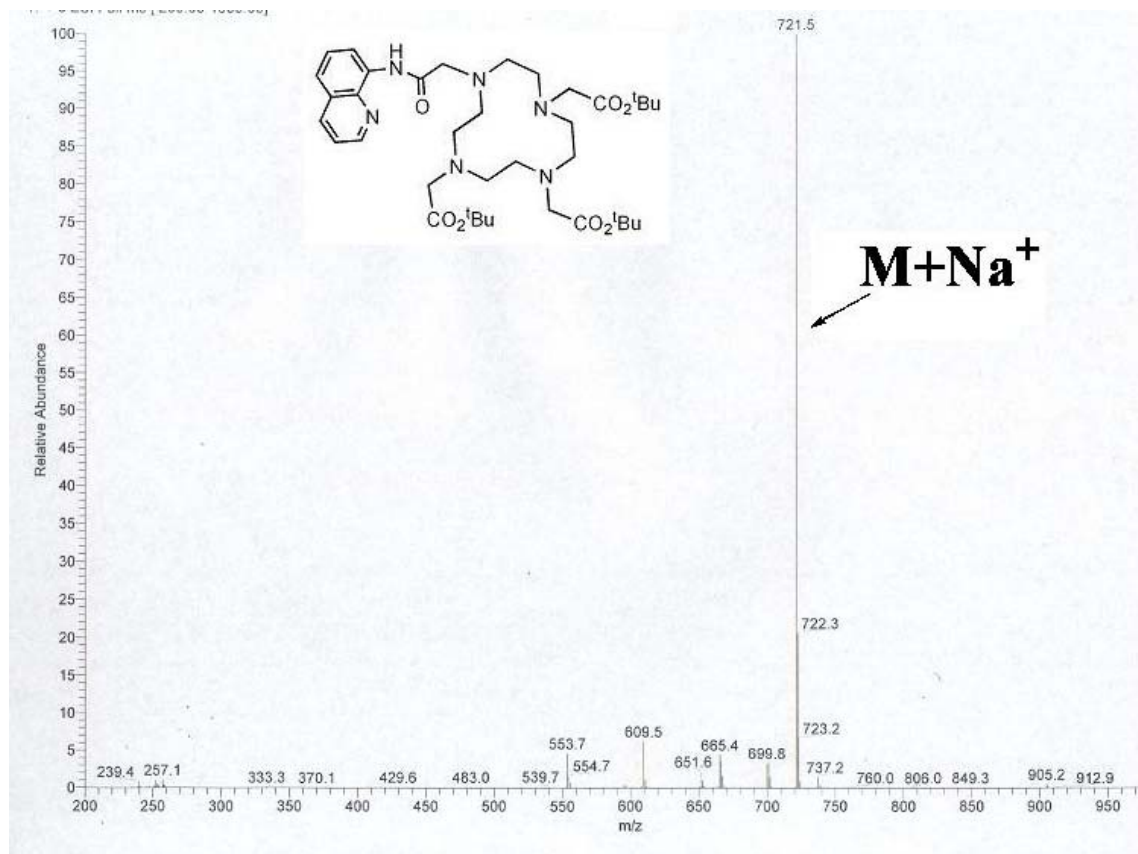

**Fig. S1.** ESI-MS of 1-(N-quinolin-8-yl-acetamide)-4,7,10-tris(acetic acid)-1,4,7,10-tetraazacyclododecane (3).

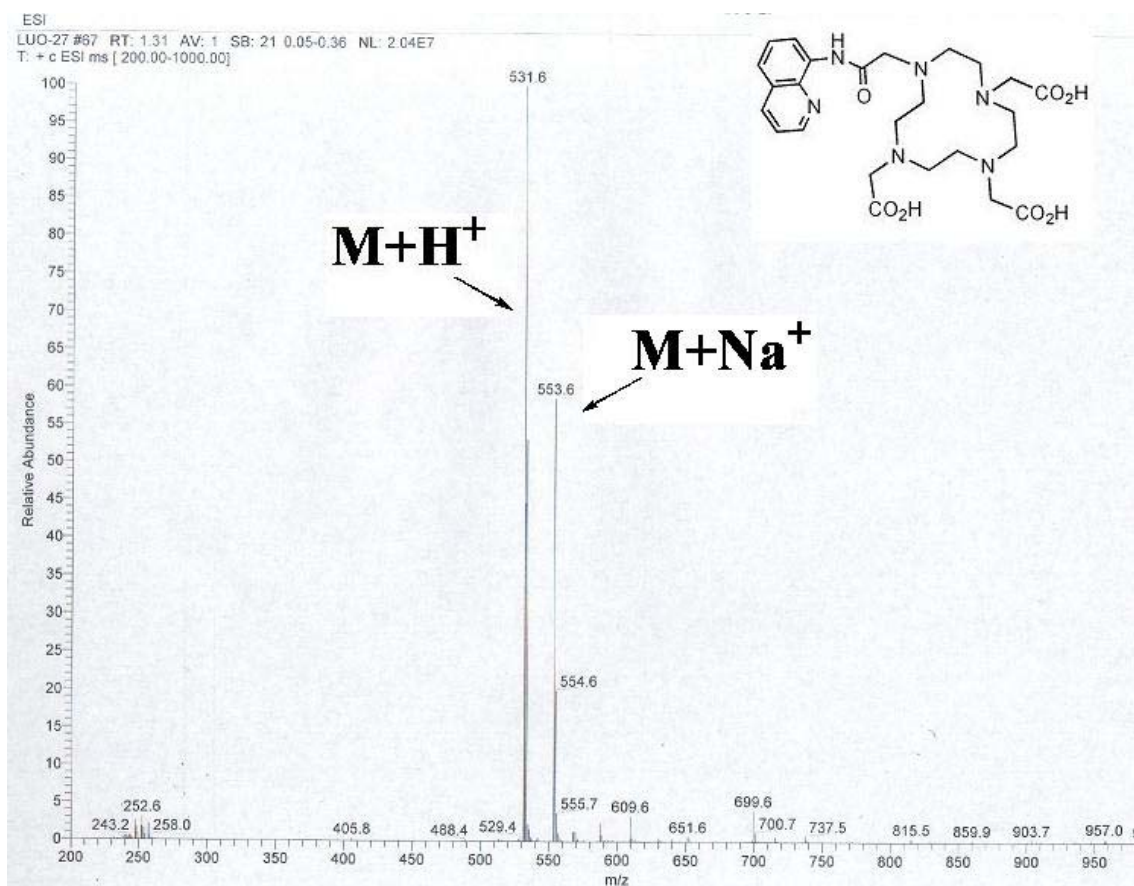

**Fig. S2.** ESI-MS of ligand H<sub>3</sub>QDOTAMA.

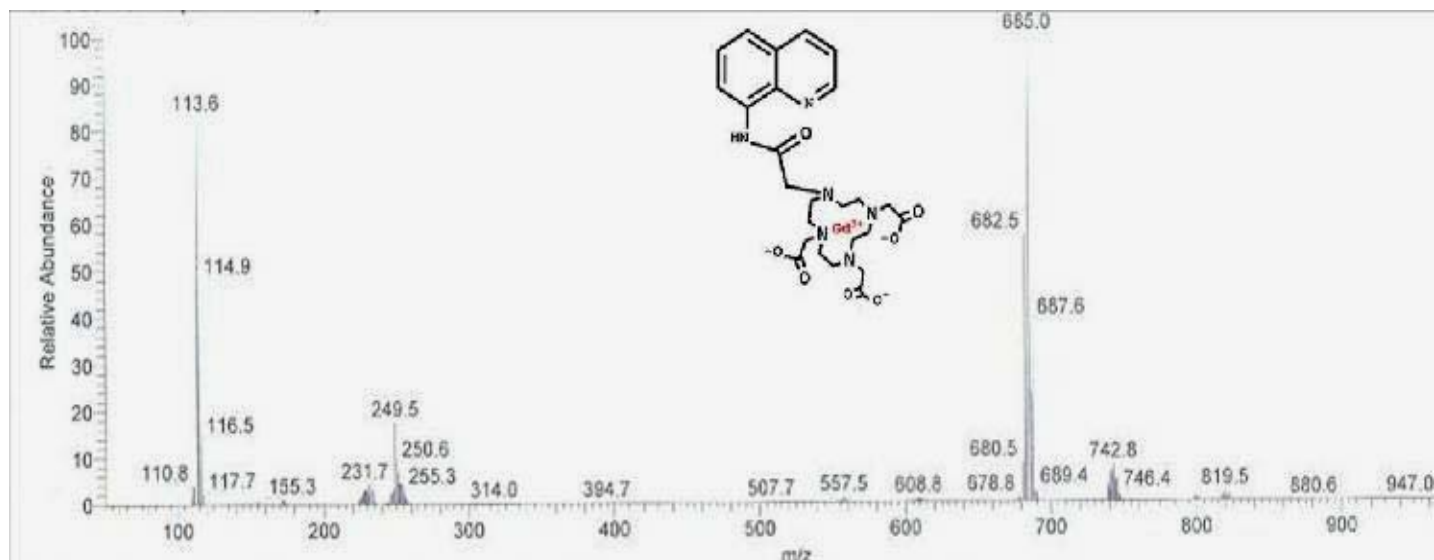

**Fig. S3.** ESI-MS of Gd-QDOTAMA.

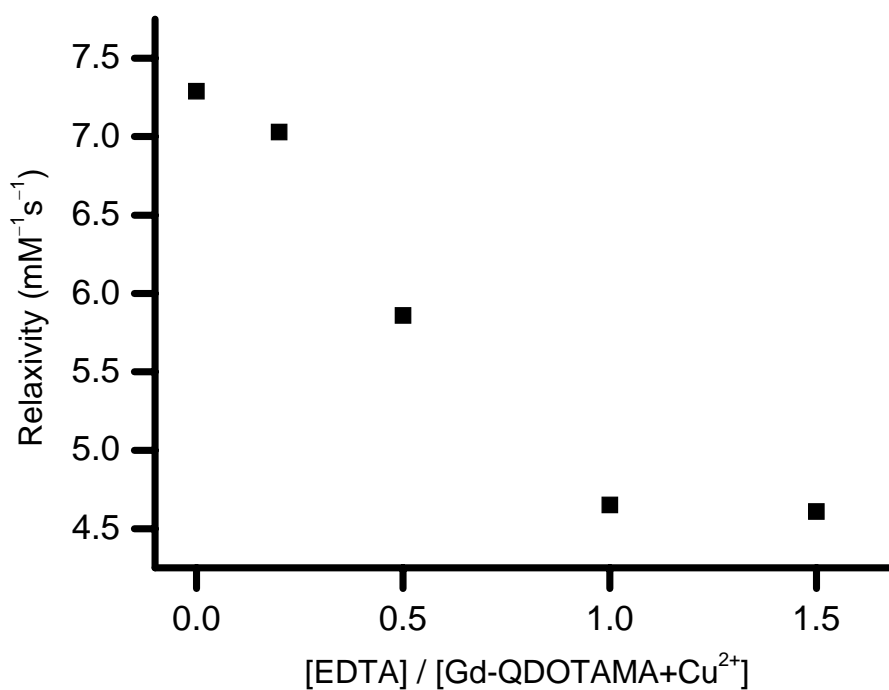

**Fig. S4.** Relaxivity changes of Gd-QDOTAMA+Cu<sup>2+</sup> by addition of 0–1.5 equiv. of EDTA in 100 mM hepes buffer at pH 7.2.  $T_1$  measurements were acquired at 400 MHz and 25 °C.

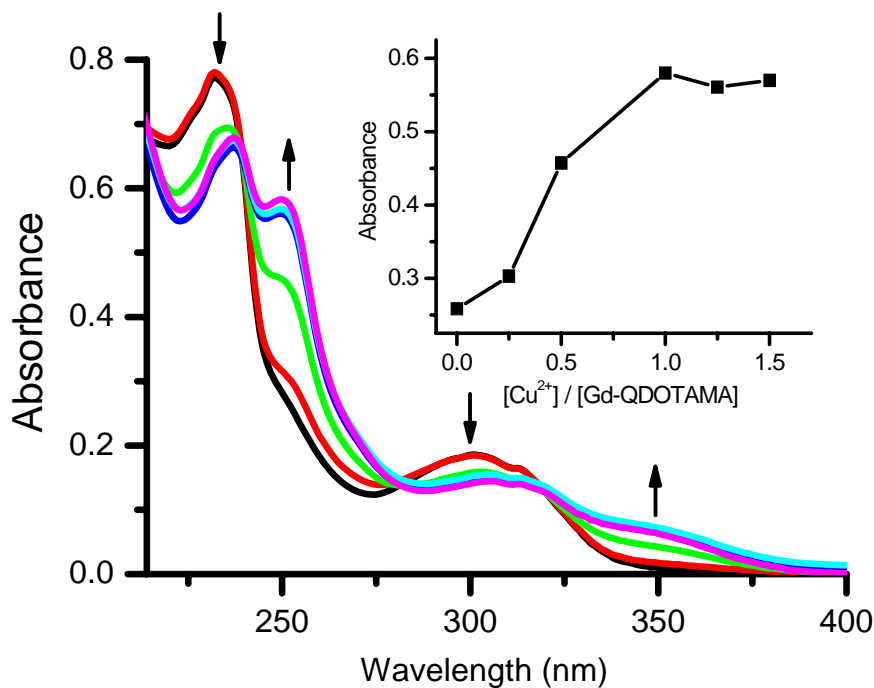

**Fig. S5.** UV-vis spectral changes for complex Gd-QDOTAMA (0.4 mM) upon titration with CuCl<sub>2</sub> (0–1.5 equiv) in H<sub>2</sub>O. Inset: dependence of the absorbance at  $\lambda = 250$  nm on the concentration ratio [Cu<sup>2+</sup>]/[Gd-QDOTAMA], showing a 1:1 binding ratio between Gd-QDOTAMA and Cu<sup>2+</sup>.

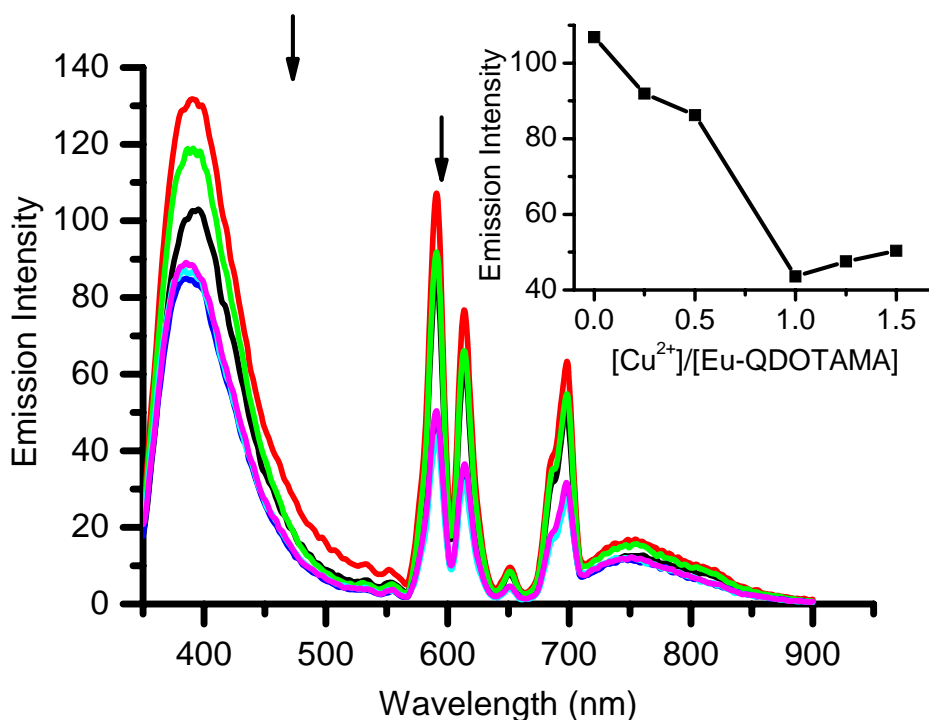

**Fig. S6.** Emission spectral changes ( $\lambda_{\text{ex}} = 300$  nm) for Eu-QDOTAMA (0.4 mM) upon titration with CuCl<sub>2</sub> (0–1.5 equiv) in H<sub>2</sub>O. Inset: dependence of Eu<sup>III</sup>-based emission intensity at  $\lambda_{\text{em}} = 591$  nm on the concentration ratio [Cu<sup>2+</sup>]/[Eu-QDOTAMA], showing a 1:1 binding ratio between Eu-QDOTAMA and Cu<sup>2+</sup>.
